# Supplementary material for: EphB2-dependent signaling promotes neuronal excitotoxicity and inflammation in the acute phase of ischemic stroke
Source: Springer Nature journal article supplement (doi:10.1186/s40478-019-0669-7), 2019-02-05
Supplement: MOESM2 [file 25666658]

## ADDITIONAL FILE 2

### **EphB2-dependent signaling promotes neuronal excitotoxicity and inflammation in the acute phase of ischemic stroke**

Anne-Sophie Ernst <sup>1,\*</sup>, Laura-Inès Böhler <sup>1,\*</sup>, Anna M. Hagenston <sup>2</sup>, Angelika Hoffmann <sup>3</sup>, Sabine Heiland <sup>4</sup>, Carsten Sticht <sup>5</sup>, Martin Bendszus <sup>3</sup>, Markus Hecker <sup>1</sup>, Hilmar Bading <sup>2</sup>, Hugo H. Marti <sup>1</sup>, Thomas Korff <sup>1,\*</sup>, Reiner Kunze <sup>1,\*</sup>

<sup>1</sup> Institute of Physiology and Pathophysiology, Department of Cardiovascular Physiology, Heidelberg University, Heidelberg, Germany

<sup>2</sup> Department of Neurobiology, Interdisciplinary Center for Neurosciences, Heidelberg University, Heidelberg, Germany

<sup>3</sup> Department of Neuroradiology, Heidelberg University Hospital, Heidelberg, Germany

<sup>4</sup> Division of Experimental Radiology, Department of Neuroradiology, Heidelberg University Hospital, Heidelberg, Germany

<sup>5</sup> Center of Medical Research, Medical Faculty Mannheim, Heidelberg University, Heidelberg, Germany

\* equal contribution

#### **Address for correspondence:**

Hugo H. Marti

Heidelberg University

Institute of Physiology and Pathophysiology

Im Neuenheimer Feld 326

69120 Heidelberg, Germany

Phone 49-6221-544138

FAX 49-6221-548224

E-mail [hugo.marti@physiologie.uni-heidelberg.de](mailto:hugo.marti@physiologie.uni-heidelberg.de)

## Supplementary Tables

**Table S1** List of primers used to genotype mice.

| Allele              | Primer name | Primer sequence (5'-3')           | Size (bp) of amplicon |
|---------------------|-------------|-----------------------------------|-----------------------|
| <i>Nestin:cre</i>   | Cre1        | ACCAGGTTCGTTCACATCATGG            | 217                   |
|                     | Cre2        | AGGCTAAGTGCCTTCTCTACAC            |                       |
| <i>Efnb2</i> floxed | B2Cas1      | TGCTTGATTGAAACGAAGCCCGA           | wt: 240               |
|                     | B2Cs1       | CTTCAGCAATATACACAGGATG            | floxed: 320           |
| <i>Ephb2</i> null   | EphB2-F1    | AAA CCC TGA TGG ACT CTA CGA CAG C | wt: 600               |
|                     | Neo3        | GTC AGT TTC ATA GCC TGA AGA ACG   | null: 300             |
|                     | N1B         | GGG TAC ATC TCA GTG GTA GAA TG    |                       |

**Table S2** Overview of animals that met defined exclusion criteria.

Animals that met the following criteria were excluded from end-point analyses: (1) death during surgery due to procedural or anesthetic problems, (2) death before sampling, (3) intracerebral hemorrhage, (4) structural brain abnormalities (e.g. hydrocephalus), and (5) no infarction.

| mouse line                    | number of mice met exclusion criteria (% of total animals) |     |     |     |     |               |
|-------------------------------|------------------------------------------------------------|-----|-----|-----|-----|---------------|
|                               | (1)                                                        | (2) | (3) | (4) | (5) | total         |
| WT                            | 5                                                          | 1   | 1   | 1   | 2   | 10 / 99 (10%) |
| <i>Ephb2</i> <sup>+/-</sup>   | -                                                          | -   | -   | 1   | -   | 1 / 14 (7%)   |
| <i>Ephb2</i> <sup>-/-</sup>   | -                                                          | -   | -   | 2   | 2   | 4 / 86 (5%)   |
| <i>Efnb2</i> <sup>fl/fl</sup> | -                                                          | -   | -   | -   | -   | 0 / 6 (0%)    |
| <i>nEfnb2</i> <sup>Δ/Δ</sup>  | 1                                                          | -   | -   | -   | -   | 1 / 6 (17%)   |

**Table S3** Primary antibodies used for immunofluorescent staining.

| <b>Antibody</b> | <b>Supplier, Catalogue number</b>  | <b>Dilution</b> | <b>Fixation</b> | <b>Blocking</b> |
|-----------------|------------------------------------|-----------------|-----------------|-----------------|
| CD31            | BD Biosciences, #557355            | 1:100           | zinc-based      | goat serum      |
| desmin          | Dianova, # DLN-13732               | 1:400           | zinc-based      | BSA/casein      |
| EphB2           | R&D Systems, #AF467                | 1:2000          | zinc-based      | BSA/casein      |
| EphB4           | R&D Systems, #AF446                | 1:1000          | zinc-based      | BSA/casein      |
| ephrin-B1       | R&D Systems, #AF473                | 1:4000          | zinc-based      | BSA/casein      |
| ephrin-B2       | R&D Systems, #AF496                | 1:500           | zinc-based      | BSA/casein      |
| GFAP            | Agilent, #Z0334                    | 1:1000          | zinc-based      | BSA/casein      |
| Iba-1           | FUJIFILM Wako, #019-19741          | 1:500           | 1% PFA          | BSA/casein      |
| Ly6G            | BD Biosciences, #551459            | 1:250           | 1% PFA          | Sea block       |
| NeuN            | Bio-Techne, #NBP1-92693            | 1:500           | 2% PFA          | BSA/casein      |
| NF-kB           | BioLegend, #622602                 | 1:200           | 3% PFA          | Sea block       |
| ZO-1            | Thermo Fisher Scientific, #61-7300 | 1:100           | zinc-based      | goat serum      |

**Table S4** List of primers used for quantitative real-time RT-PCR.

| Gene               | Forward primer sequence (5'-3') | Reverse primer sequence (5'-3') |
|--------------------|---------------------------------|---------------------------------|
| <i>Cox2</i>        | AGAAGGAAATGGCTGCAGAA            | GCTCGGCTTCCAGTATTGAG            |
| <i>Efnb1</i>       | ATCGCAAGCATAACACAGCAG           | TGGGGGCAGTAGTTGTTCTC            |
| <i>Efnb2</i>       | AGGAATCACGGTCCAACAAG            | GTCTCCTGCGGTACTTGAGC            |
| <i>Efnb2 exon2</i> | TCAACTGTGCCAGACCAGAC            | TAGACCCCAGAGGTTAGGGC            |
| <i>Ephb2</i>       | ACTATGGCGGCTGTATGTCC            | GCACATCCAATTCTTCAGCA            |
| <i>Il-1b</i>       | ATAACCTGCTGGTGTGTGACG           | GGTGGAGAGCTTTCAGCTCAT           |
| <i>Il-6</i>        | AGTTGCCTTCTTGGGACTGA            | TCCACGATTTCCCAGAGAAC            |
| <i>Mcp-1</i>       | CCCAATGAGTAGGCTGGAGA            | TCTGGACCCATTCCTTCTTG            |
| <i>Rps12</i>       | GAAGCTGCCAAAGCCTTAGA            | AACTGCAACCAACCACCTTC            |
| <i>Tnf</i>         | CGTCAGCCGATTTGCTATCT            | CGGACTCCGCAAAGTCTAAG            |
| <i>Vegfa</i>       | GTACCTCCATGCCAAGT               | ACTCCAGGGCTTCATCGTTA            |

*Cox2*, Cyclooxygenase-2; *Efnb1/2*, ephrin-B1/2, *Ephb2*, EphB2; *Il-1b*, interleukin-1 beta; *Il-6*, interleukin-6; *Mcp-1*, monocyte chemoattractant protein-1; *Rps12*, ribosomal protein S12; *Tnf*, tumor necrosis factor alpha; *Vegf*, vascular endothelial growth factor

**Table S5** KEGG pathway-Based gene set enrichment analyses (GSEA).

*Ephb2*<sup>-/-</sup> and WT mice ( $n = 3$ ) were subjected to 60 min MCAO followed by 48 hours reperfusion. Total RNA was extracted from ipsilesional brain tissue and processed for DNA microarray analysis (GeneChip Mouse Gene 2.0 ST; Affymetrix, Santa Clara, CA, USA). The table lists certain significantly UP and DOWN-regulated gene sets comparing *Ephb2*<sup>-/-</sup> versus WT matching the following criteria for selection:  $\geq 1.5$ - or  $\leq 1.5$ -fold regulation (log<sub>2</sub>-fold),  $p < 0.05$  (ANOVA), FDR  $< 0.1$ . NES: normalized enrichment score; FDR: false discovery rate.

|                                        | <b>PATHWAY NAME</b>                    | <b>NES</b> | <b>NOM p-val</b> | <b>FDR q-val</b> |
|----------------------------------------|----------------------------------------|------------|------------------|------------------|
| cell death                             | FoxO signaling pathway                 | -1.80      | <0.001           | 0.004            |
|                                        | Proteasome                             | -1.98      | <0.001           | 0.001            |
|                                        | Apoptosis                              | -2.00      | <0.001           | 0.001            |
|                                        | p53 signaling pathway                  | -2.13      | <0.001           | <0.001           |
| inflammation and immune cell signaling | Platelet activation                    | -1.50      | 0.003            | 0.048            |
|                                        | NOD-like receptor signaling pathway    | -1.55      | 0.011            | 0.031            |
|                                        | Chemokine signaling pathway            | -1.76      | <0.001           | 0.006            |
|                                        | Fc gamma R-mediated phagocytosis       | -1.79      | <0.001           | 0.005            |
|                                        | Toll-like receptor signaling pathway   | -1.97      | <0.001           | 0.001            |
|                                        | Antigen processing and presentation    | -2.00      | <0.001           | 0.001            |
|                                        | B cell receptor signaling pathway      | -2.07      | <0.001           | <0.001           |
|                                        | Leukocyte transendothelial migration   | -2.15      | <0.001           | <0.001           |
|                                        | Complement and coagulation cascades    | -2.16      | <0.001           | <0.001           |
|                                        | TNF signaling pathway                  | -2.17      | <0.001           | <0.001           |
|                                        | NF-kappa B signaling pathway           | -2.20      | <0.001           | <0.001           |
|                                        | Cytokine-cytokine receptor interaction | -2.23      | <0.001           | <0.001           |
| synaptic function                      | Glutamatergic synapse                  | 2.08       | <0.001           | 0.001            |
|                                        | Retrograde endocannabinoid signaling   | 1.97       | <0.001           | 0.001            |
|                                        | GABAergic synapse                      | 1.87       | <0.001           | 0.005            |
|                                        | Axon guidance                          | 1.83       | <0.001           | 0.007            |
|                                        | Calcium signaling pathway              | 1.77       | <0.001           | 0.011            |
|                                        | Dopaminergic synapse                   | 1.51       | 0.005            | 0.082            |
